# Supplementary material for: Dimethyltin(iv)-4,6-dimethyl-2-pyridylselenolate: an efficient single source precursor for the preparation of SnSe nanosheets as anode material for lithium ion batteries
Source: Royal Society of Chemistry journal article supplement (doi:10.1039/d1dt01312b), 2021-01-01
Supplement: d1dt01312b1.pdf [file d1dt01312b1.pdf]

## Dimethyltin(IV)-4,6-dimethyl-2-pyridylselenolate: An Efficient Single Source Precursor for the Preparation of SnSe Nanosheets as Anode Material for Lithium Ion Batteries

Gourab Karmakar,<sup>a,b</sup> Kruti K. Halankar,<sup>a</sup> Adish Tyagi,<sup>\*a,b</sup> B. P. Mandal,<sup>a,b</sup> A. P. Wadawale,<sup>a</sup> G. Kedarnath,<sup>\*a,b</sup> A. P. Srivastava<sup>c</sup> and Vishal Singh<sup>c</sup>

<sup>a</sup>Chemistry Division, Bhabha Atomic Research Centre, Mumbai- 400 085 (India),

<sup>b</sup>Homi Bhabha National Institute, Anushaktinagar, Mumbai- 400 094 (India)

<sup>c</sup>Materials Science Division, Bhabha Atomic Research Centre, Mumbai- 400 085 (India).

Email: [tyagia@barc.gov.in](mailto:tyagia@barc.gov.in), [kedar@barc.gov.in](mailto:kedar@barc.gov.in)

### Figure captions

Figure S1. <sup>77</sup>Se{<sup>1</sup>H} NMR spectra of bis(4,6-dimethyl-2-pyridyl)diselenide

Figure S2. <sup>77</sup>Se{<sup>1</sup>H} NMR spectra of [Me<sub>2</sub>Sn{2-SeC<sub>5</sub>H<sub>2</sub>(Me-4,6)<sub>2</sub>N<sub>2</sub>}<sub>2</sub>] (**1**)

Figure S3. XRD pattern of TG residue of [Me<sub>2</sub>Sn{2-SeC<sub>5</sub>H<sub>2</sub>(Me-4,6)<sub>2</sub>N<sub>2</sub>}<sub>2</sub>] (**1**) obtained at 800°C .

Figure S4. Deconvolution of pXRD peaks (2θ; 30-31.6°) of tin selenide material synthesized in DDT

Figure S5. EDS spectra of tin selenide nanostructures obtained by thermolysis of [Me<sub>2</sub>Sn{2-SeC<sub>5</sub>H<sub>2</sub>(Me-4,6)<sub>2</sub>N<sub>2</sub>}<sub>2</sub>] (**1**) in (a) DDT, (b) OAm+DDT (1:1, v/v) respectively.

Figure S6. EDS spectra of SnSe nanostructures obtained by (a) pyrolysis of **1** and thermolysis of **1** in (b) OAm and (c) ODE respectively.

Figure S7. 2-D Elemental mapping of SnSe nanostructures obtained by (a) pyrolysis of **1** and thermolysis of **1** in (b) OAm and (c) ODE respectively.

Figure S8. SAED pattern of SnSe nanostructures obtained by (a) pyrolysis of **1** and thermolysis of **1** in (b) OAm and (c) ODE respectively.

Figure S9. (a) pXRD pattern, (b) FT-IR spectra, (c) SEM micrograph and (d) EDS spectra of electrode after 100 cycles.

Figure S10. (a) Cycling, coulombic efficiency and normalized capacity of full cell LiNi<sub>0.6</sub>Mn<sub>0.2</sub>Co<sub>0.2</sub>O<sub>2</sub> // SnSe at current density 100 mA g<sup>-1</sup> and (b) Cycling and coulombic efficiency of LiNi<sub>0.6</sub>Mn<sub>0.2</sub>Co<sub>0.2</sub>O<sub>2</sub> at current density 100 mA g<sup>-1</sup>.

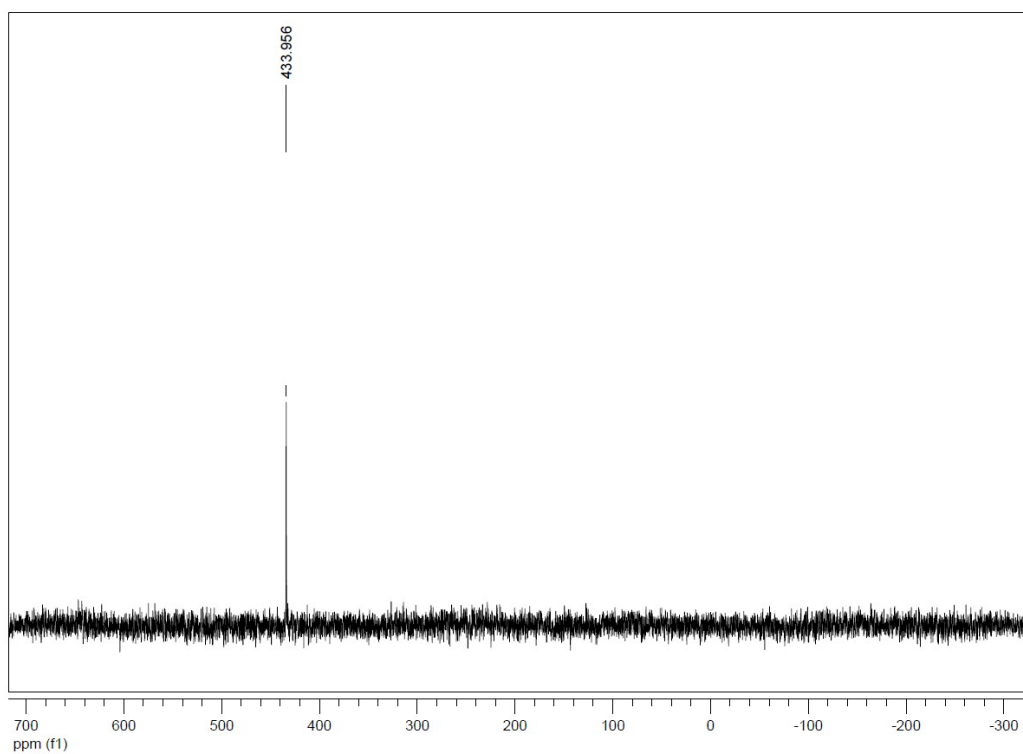

Figure S1.  $^{77}\text{Se}\{^1\text{H}\}$  NMR spectra of bis(4,6-dimethyl-2-pyridyl)diselenide

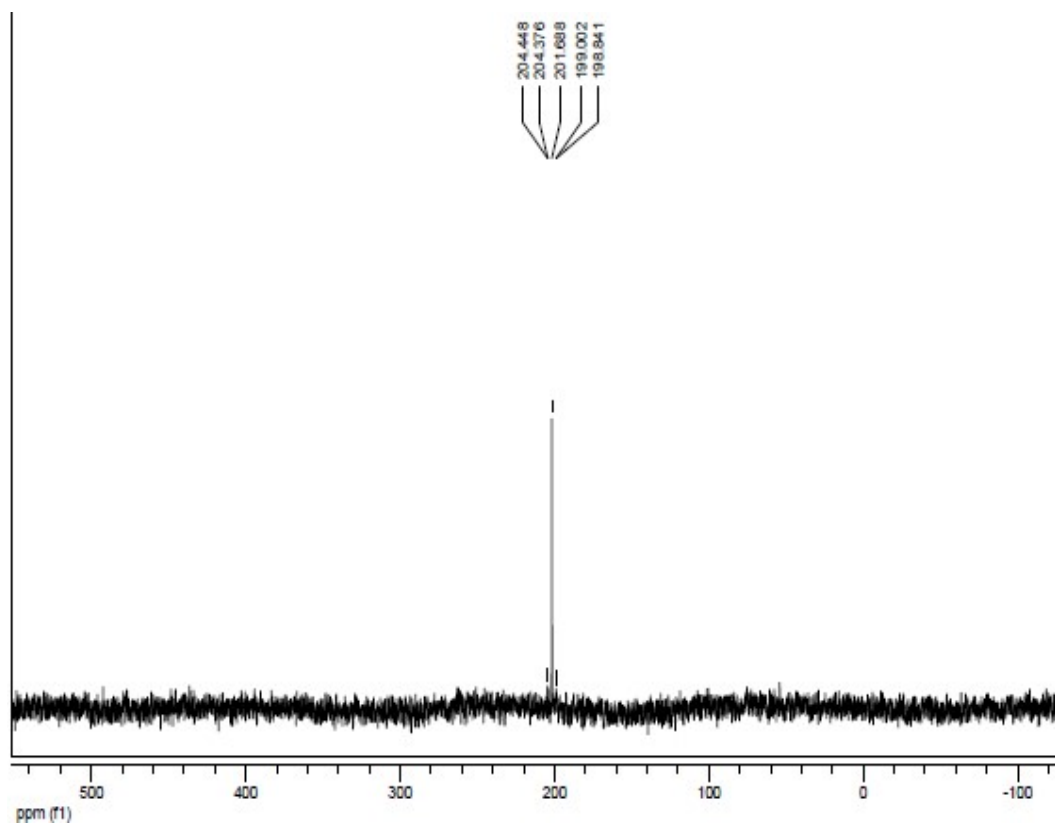

Figure S2.  $^{77}\text{Se}\{^1\text{H}\}$  NMR spectra of  $[\text{Me}_2\text{Sn}\{2\text{-SeC}_5\text{H}_2(\text{Me-4,6})_2\text{N}\}_2]$  (**1**)

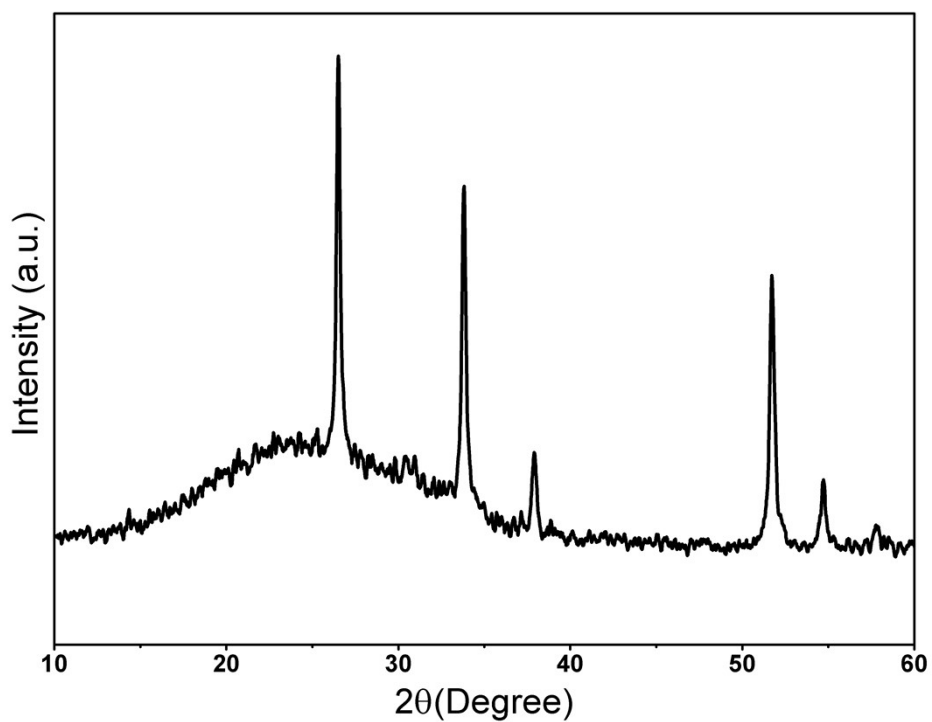

Figure S3. XRD pattern of TG residue of  $[\text{Me}_2\text{Sn}\{2\text{-SeC}_5\text{H}_2(\text{Me-4,6})_2\text{N}\}_2]$  (**1**) obtained at 800°C.

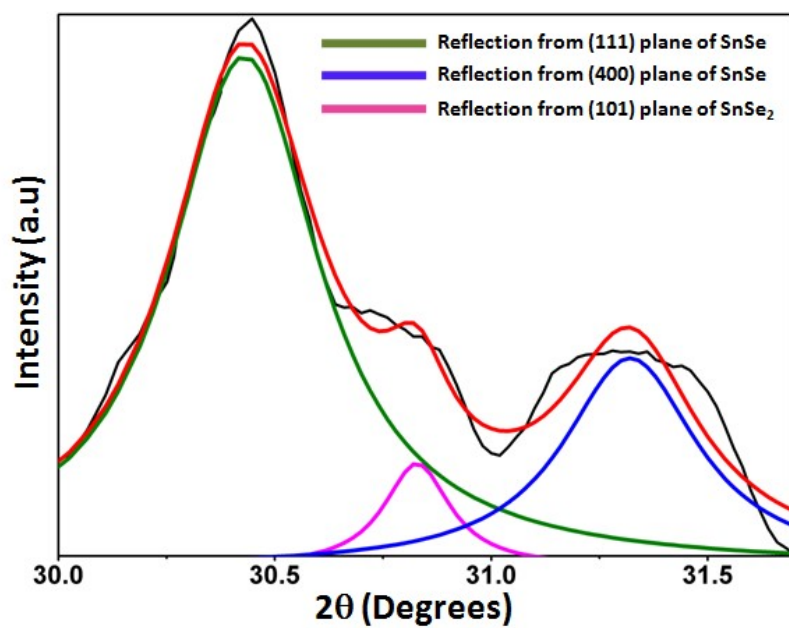

Figure S4. Deconvolution of pXRD peaks ( $2\theta$ ; 30-31.6°) of tin selenide material synthesized in DDT

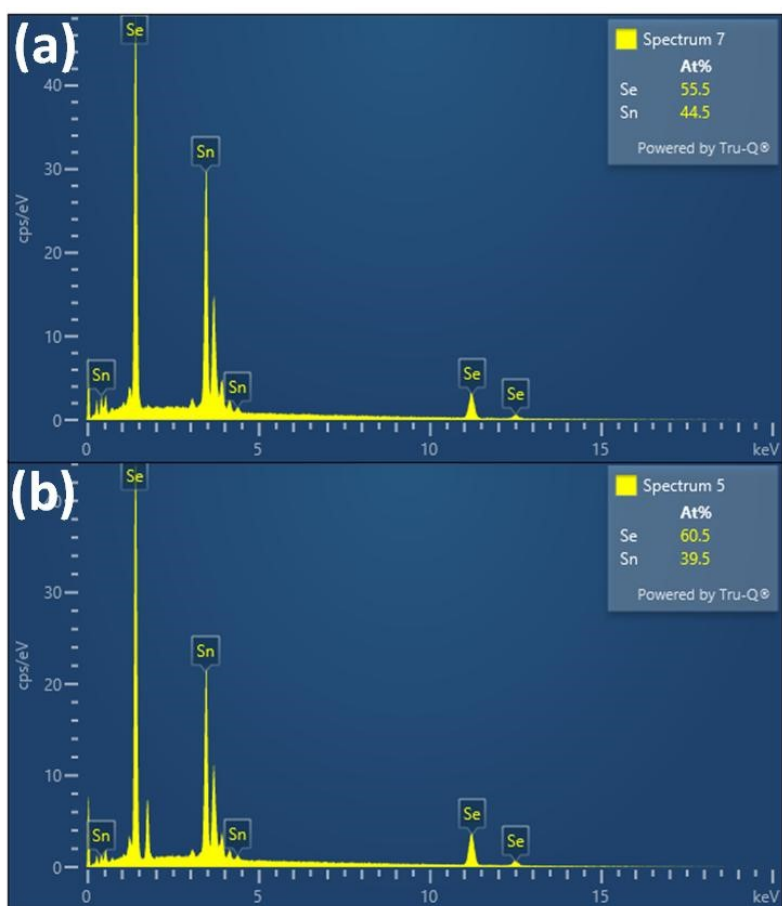

Figure S5. EDS spectra of tin selenide nanostructures obtained by thermolysis of  $[\text{Me}_2\text{Sn}\{2\text{-SeC}_5\text{H}_2(\text{Me-4,6})_2\text{N}\}_2]$  (**1**) in (a) DDT, (b) OAm+DDT (1:1, v/v) respectively.

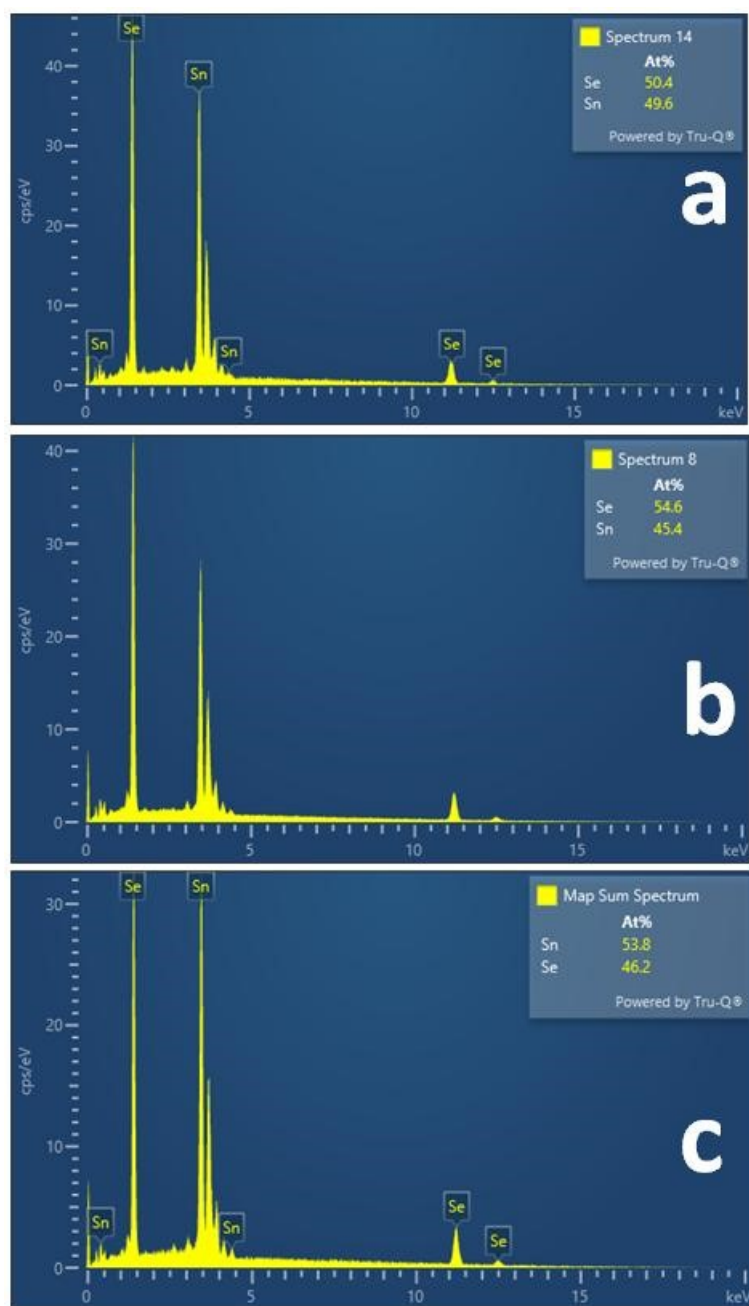

Figure S6. EDS spectra of SnSe nanostructures obtained by (a) pyrolysis of **1** and thermolysis of **1** in (b) OAm and (c) ODE respectively.

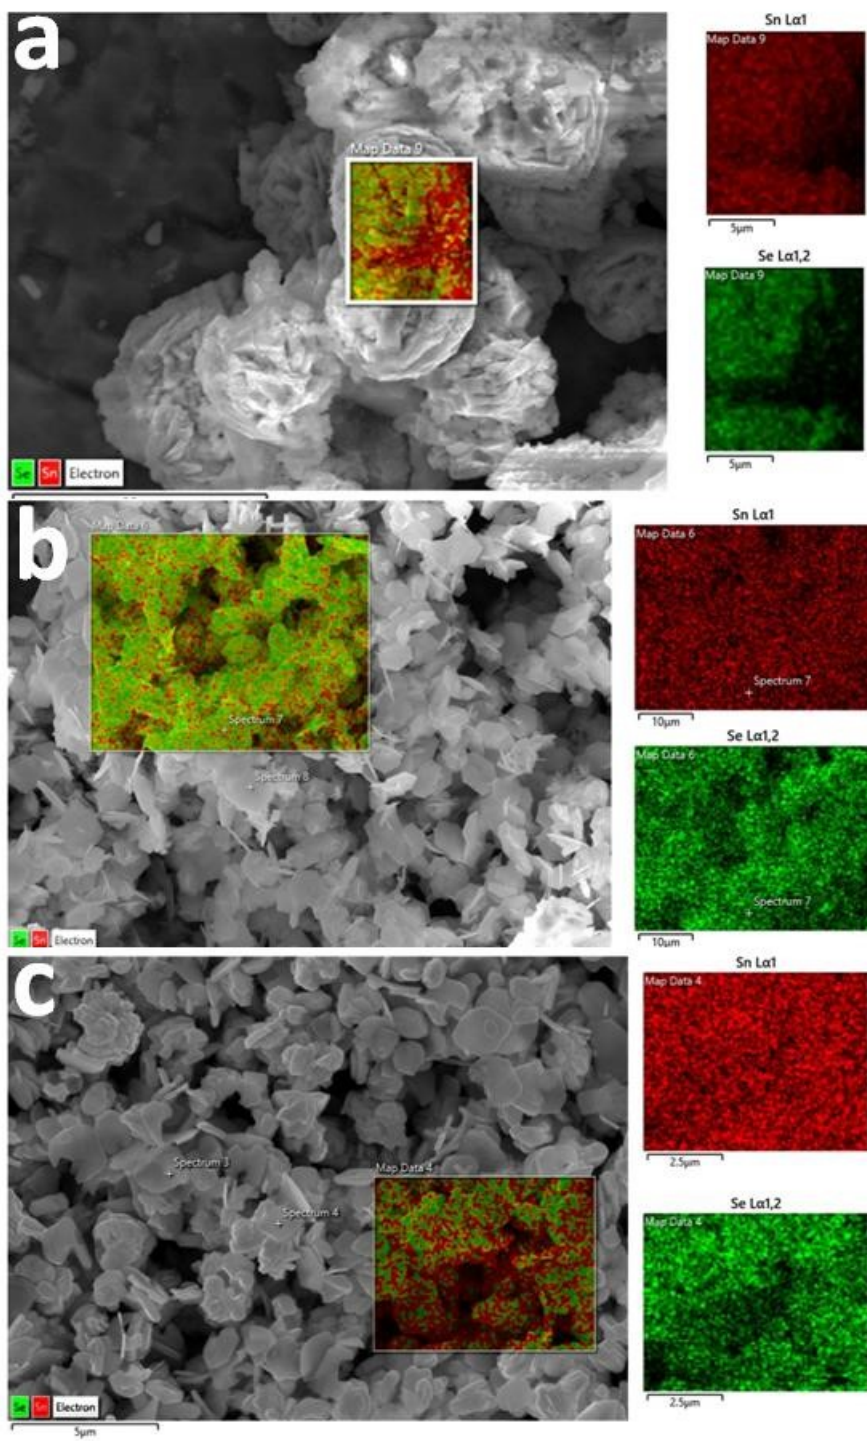

Figure S7. 2-D Elemental mapping of SnSe nanostructures obtained by (a) pyrolysis of **1** and thermolysis of **1** in (b) OAm and (c) ODE respectively.

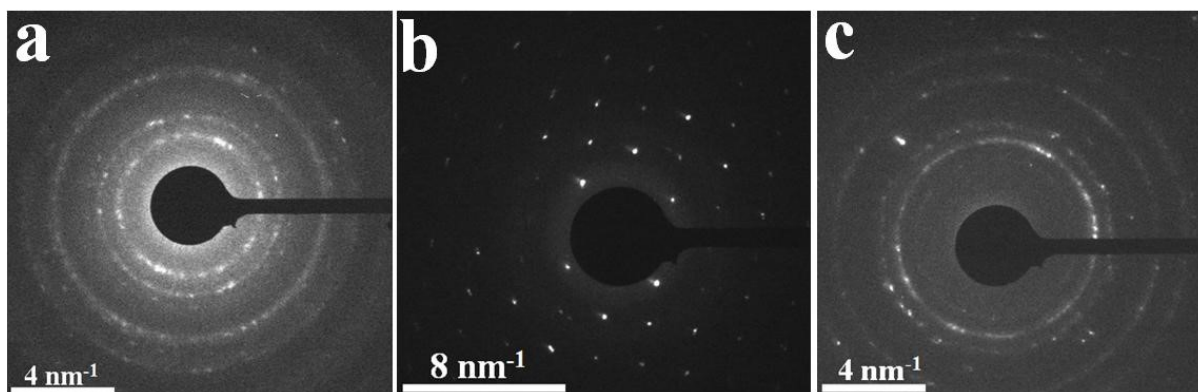

Figure S8. SAED pattern of SnSe nanostructures obtained by (a) pyrolysis of **1** and thermolysis of **1** in (b) OAm and (c) ODE respectively.

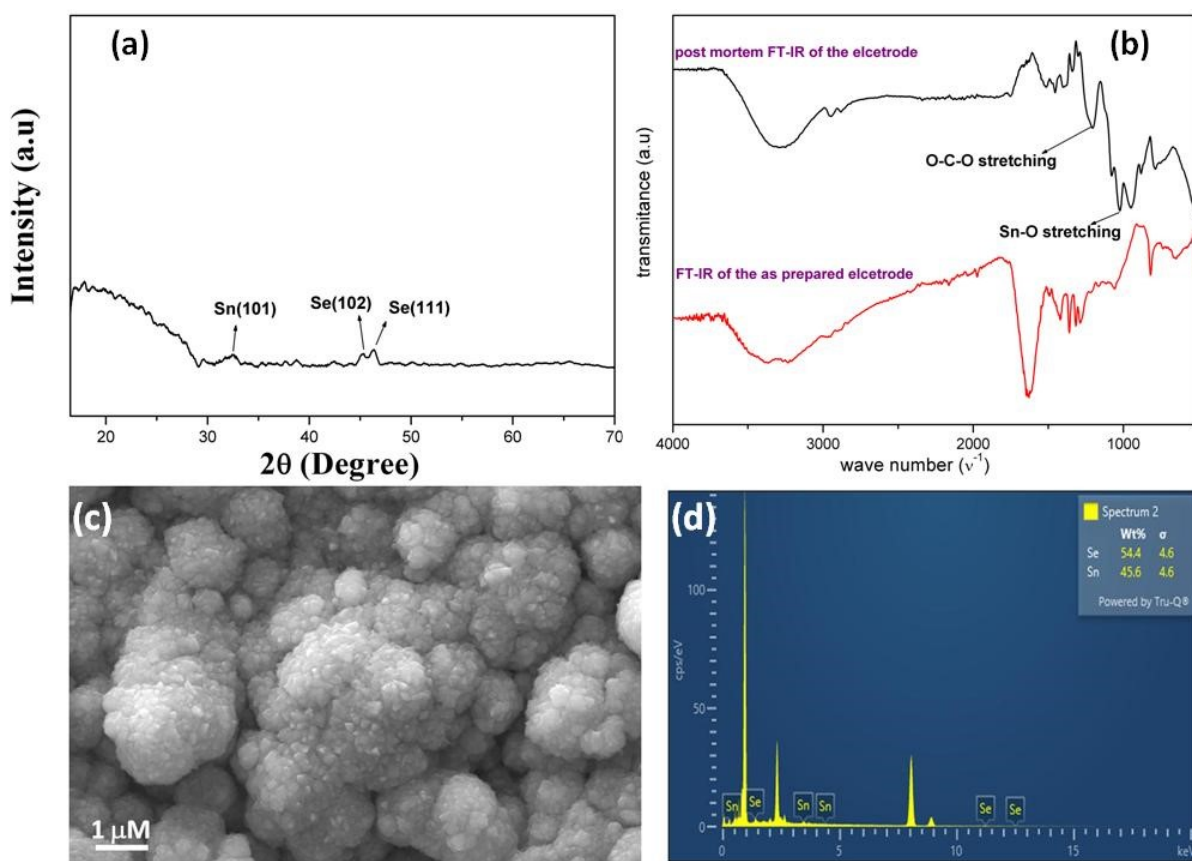

Figure S9. (a) pXRD pattern, (b) FT-IR spectra, (c) SEM micrograph and (d) EDS spectra of electrode after 100 cycles.



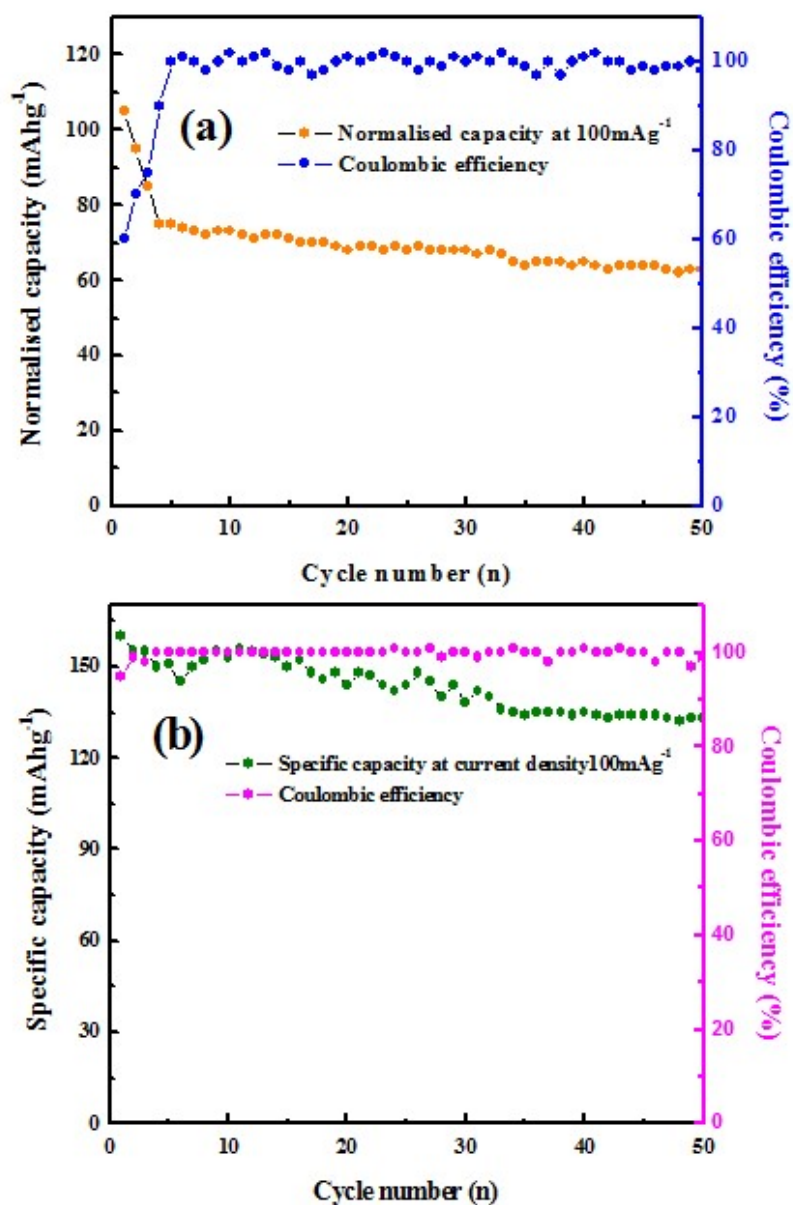

Figure S10. (a) Cycling, coulombic efficiency and normalized capacity of full cell  $\text{LiNi}_{0.6}\text{Mn}_{0.2}\text{Co}_{0.2}\text{O}_2 // \text{SnSe}$  at current density  $100 \text{ mA g}^{-1}$  and (b) Cycling and coulombic efficiency of  $\text{LiNi}_{0.6}\text{Mn}_{0.2}\text{Co}_{0.2}\text{O}_2$  at current density  $100 \text{ mA g}^{-1}$ .
